# Supplementary material
Source: publisher site journal article supplement (https://www.dovepress.com/article/340351)
Supplement: Supplementary file 1 [file get_supplementary_file.php]

**Supplement Table 1, Clinical characteristics of RA patients at baseline (0 week) and after triple therapy (14 weeks)**

|  | Non-responder Group (n=5) | | |  | Responder Group (n=15) | | | P-value |
| --- | --- | --- | --- | --- | --- | --- | --- | --- |
| 0 week | 14 weeks | Changed Values |  | 0 week | 14 weeks | Changed Values |
| Pain assessment, VAS& | 59.80±16.25 | 44.40±18.89 | 15.40±8.64 |  | 57.73±9.87 | 29.2±14.16 | 28.53±18.74 | 0.152 |
| SJC, n& | 8.60±1.14 | 8.00 ±1.92 | 0.60±0.89 |  | 8.20±2.24 | 3.20±2.34 | 5.00±2.72 | 0.002** |
| TJC, n& | 12.40±1.14 | 10.20±1.64 | 2.20±0.83 |  | 11.66±2.47 | 4.46±2.29 | 7.20±3.54 | 0.006** |
| PGA, VAS& | 58.00±16.43 | 46.00±18.17 | 12.00±8.36 |  | 59.66±14.69 | 21.66±11.17 | 38.00±19.16 | 0.009** |
| PtGA, VAS& | 57.20±21.51 | 42.00±15.23 | 15.20±8.31 |  | 60.26±13.66 | 25.33±14.06 | 34.93±15.51 | 0.015* |
| HAQ, scores& | 1.60±0.68 | 1.29±0.58 | 6.20±4.81 |  | 1.49±0.50 | 0.83±0.35 | 13.13±5.91 | 0.029* |
| CRP, mg/L& | 37.20±8.45 | 20.50±3.59 | 16.63±4.92 |  | 36.36±12.68 | 9.89±5.53 | 26.47±13.41 | 0.132 |
| ESR, mm/h& | 63.00±15.48 | 40.60±11.12 | 22.4±11.32 |  | 65.53±17.39 | 33.86±12.49 | 31.66±14.93 | 0.223 |
| ALB, g/L | 36.10±1.67 | 35.66±2.11 | 0.44±3.23 |  | 32.63±9.28 | 36.87±3.22 | -4.24±9.82 | 0.32 |
| CDAI, scores | 32.52±2.30 | 27.00±2.63 | 5.52±2.23 |  | 31.86±3.73 | 12.37±6.68 | 19.49±7.50 | 0.001** |
| SDAI, scores | 69.72±67.63 | 47.56±45.85 | 22.16±21.51 |  | 68.22±12.95 | 22.30±11.00 | 46.00±17.56 | 0.007** |
| DAS28 -ESR, scores | 6.48±0.26 | 5.79±0.36 | 0.70±0.31 |  | 5.68±0.23 | 4.10±0.53 | 1.61±0.61 | 0.005** |
| DAS28 -CRP, scores& | 5.86±0.19 | 5.22±0.15 | 0.63±0.15 |  | 5.77±0.3 | 3.72±0.75 | 2.05±0.81 | 0.001** |

*, P<0.05; **, P<0.01.

&, these results had been published in our first paper of the study (Chen J, Tang MS, Xu LC, Li S, Ge Y, Du JF, Xie X, Tian J, Chen JW, Li F. Proteomic analysis of biomarkers predicting the response to triple therapy in patients with rheumatoid arthritis. Biomed Pharmacother. 2019 Aug; 116:109026. doi: 10.1016/j.biopha.2019.109026.)

Abbreviation: CDAI, clinical disease activity index; DAS28, disease activity score in 28 joints; HAQ, Health Assessment Questionnaire; NR, non-responder; PGA, physician’s global assessment; PtGA, patient global assessment; R, responder; SDAI, simplified disease activity index; SJC, swollen joint counts; TJC, tender joint counts; VAS, visual analogue scale.
